# Supplementary material
Source: publisher figshare collection journal article supplement (https://gsajournals.figshare.com/ndownloader/files/38912718)
Supplement: Supplementary file 1 [file 38912718]

## Sheet: Supplementary Table S4
Table S4. Average number of chloroplasts per guard cell used for estimating ploidy of transgenic events
Event ID	Average number of chloroplasts per guard cell	Estimated ploidy
1a	6.9	2x
2a	7.1	2x
3a	6.6	2x
4a	6.7	2x
5c	7.4	2x
6a	7.8	2x
8a	6.9	2x
9a	6.1	2x
10c	6.8	2x
11a	13.4	4x
13b	6.8	2x
16a	7.1	2x
